# Supplementary material for: Surfactant Proteins A/D–CD14 on Alveolar Macrophages Is a Common Pathway Associated With Phagocytosis of Nanomaterials and Cytokine Production
Source: PubMed Central journal article supplement (PMC8578846; doi:10.3389/fimmu.2021.758941), 2021-10-27
Supplement: DataSheet_1.pdf [file DataSheet_1.pdf]

## *Supplementary Material*

This supplementary material contains 11 figures and 1 table:

Figure S1 Shapes of MWCNT-7, TiO<sub>2</sub>, SiO<sub>2</sub> and C60 in the suspension;

Figure S2 Chemical composition of MWCNT-7, TiO<sub>2</sub>, SiO<sub>2</sub> and C60;

Figure S3 Size distribution of MWCNT-7, TiO<sub>2</sub>, SiO<sub>2</sub> and C60 in the suspension;

Figure S4 Intratracheal spraying;

Figure S5 Immunostaining of primary alveolar macrophages;

Figure S6 Uptake of ENMs by PAMs via phagocytosis;

Figure S7 Binding of SP-A and SP-D to the ENMs;

Figure S8 Effects of SP-A, SD-D, BALF and ENMs on expression of cytokines;

Figure S9 Knockdown of CD14, LRP1, and SIRP $\alpha$  expression in PAMs;

Figure S10 Effects of SP-A, SD-D, BALF and ENMs on expression of cytokines in the receptors-knocked down PAMs;

Figure S11 Summary of the results;

Table S1 LC-MS analysis of the nanomaterial-bound proteins.

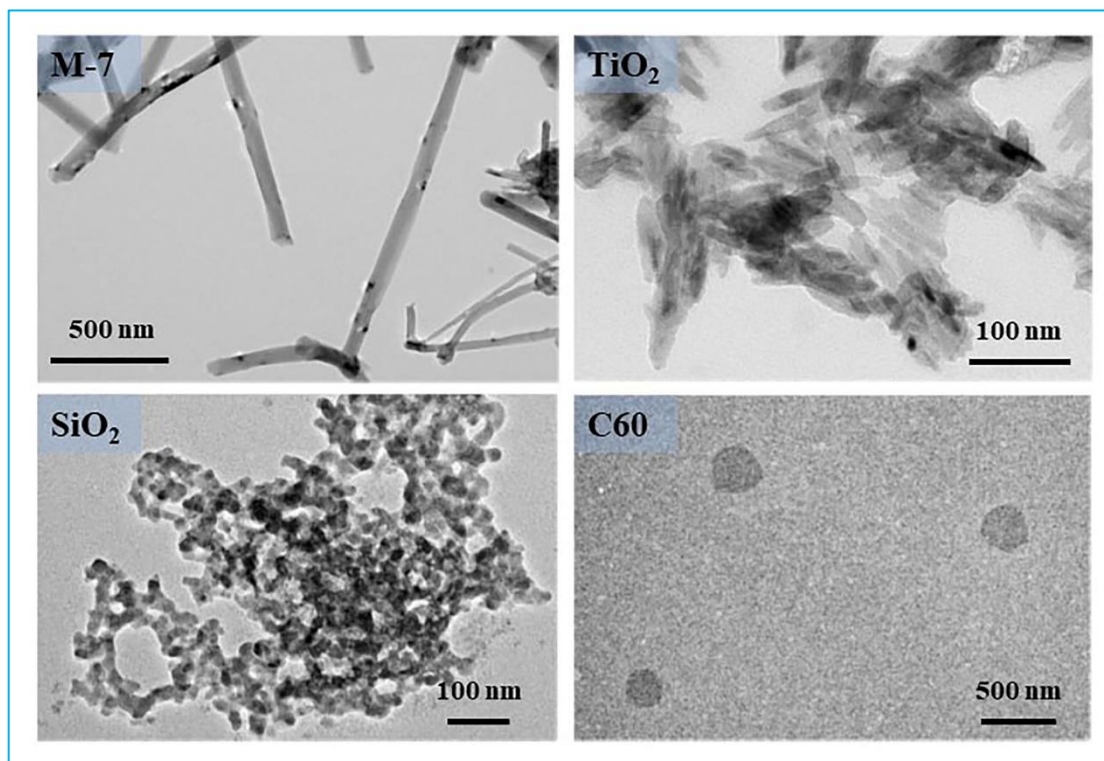

**Figure S1 Shapes of MWCNT-7, TiO<sub>2</sub>, SiO<sub>2</sub>, and C60 in the suspension**

MWCNT-7, TiO<sub>2</sub>, SiO<sub>2</sub>, and C60 were suspended in saline containing 0.5% (w/v) Pluronic® F-68 to a final concentration of 500 µg/ml. Suspensions were diluted with ddH<sub>2</sub>O 1:200 and placed on a carbon sheet. After air-drying, the samples were observed under the JEM-2100 transmission electron microscope (JEOL Co. Ltd, Tokyo, Japan).

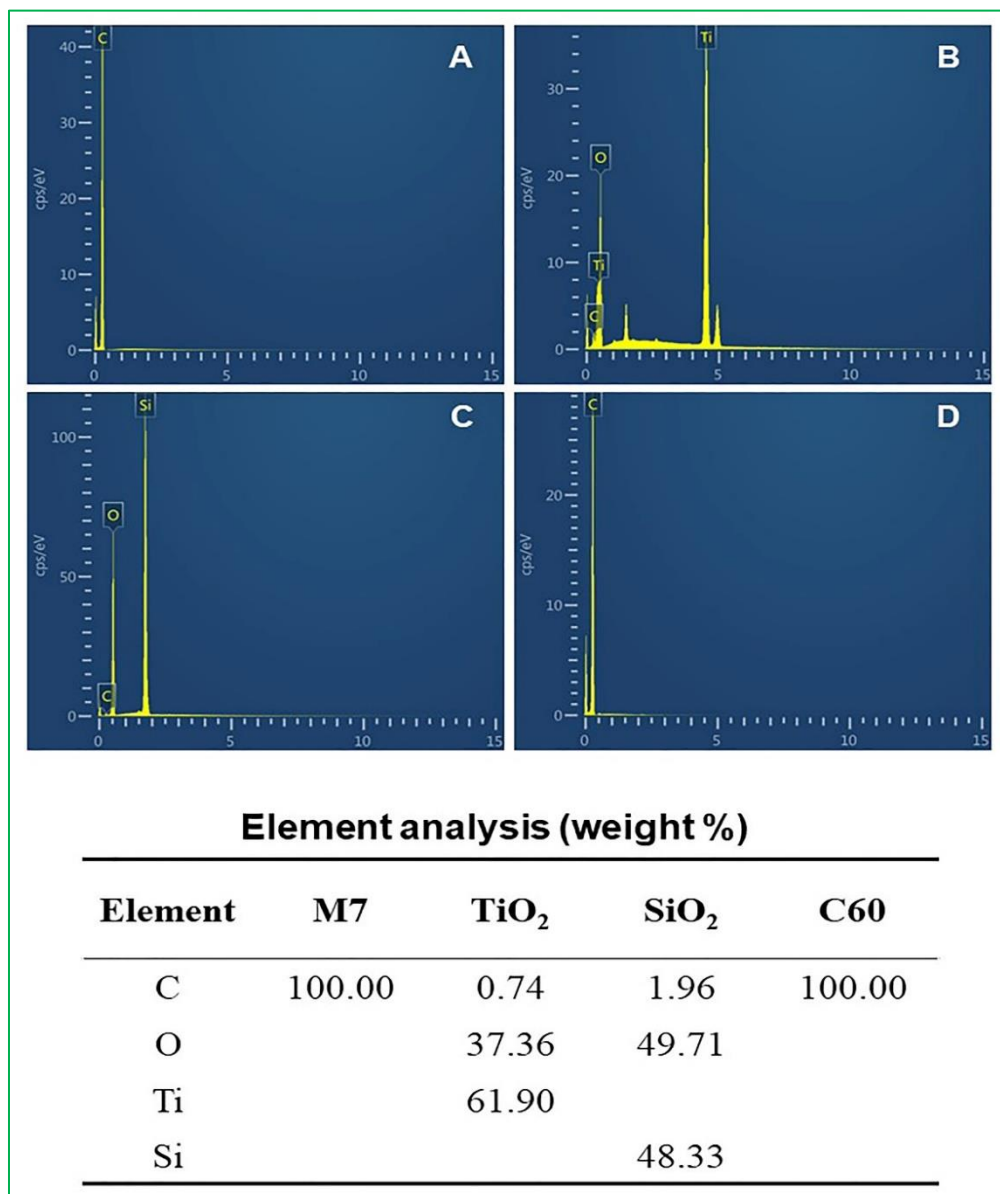

**Figure S2 Chemical composition of MWCNT-7, TiO<sub>2</sub>, SiO<sub>2</sub>, and C60s**

Suspensions of MWCNT-7, TiO<sub>2</sub>, SiO<sub>2</sub>, and C60 (500 µg/ml) were diluted with ddH<sub>2</sub>O 1:200 and placed on an aluminum plate. After air-drying, the samples were observed and analyzed by FIB-SEM (Helios G4 UC, Aztec) connected with an EBSD analysis system (Thermo Scientific). A, B, C, and D represent the spectra of MWCNT-7, TiO<sub>2</sub>, SiO<sub>2</sub>, and C60, respectively. The table under the spectra is the element composition and ratio of each of the ENMs.

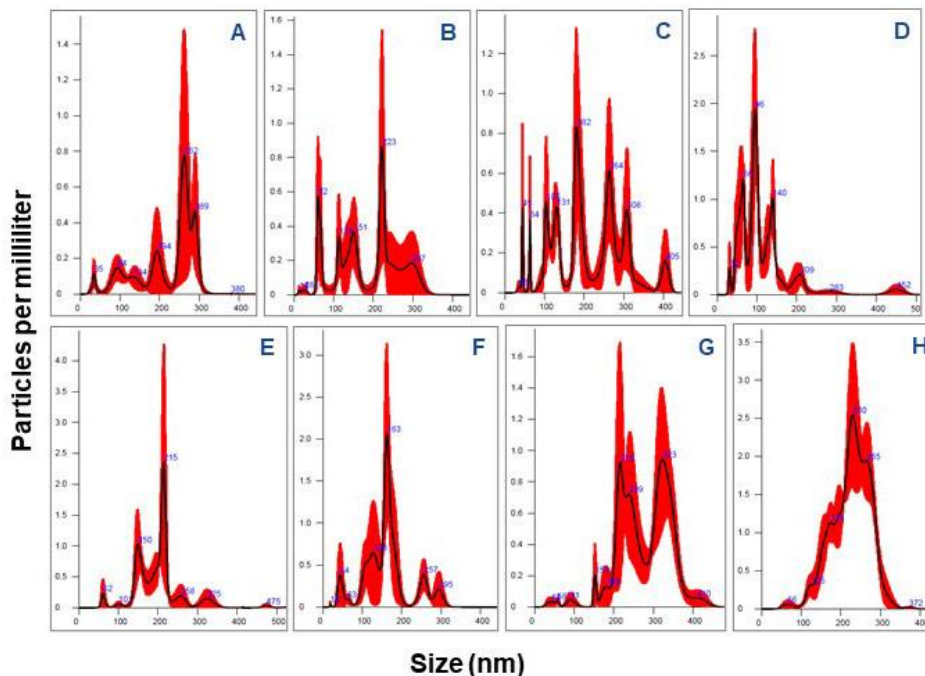

**E** Analysis of size in the suspension (mean  $\pm$  s.d. nm)

| ENM              | W/O BALF         | With BALF        |
|------------------|------------------|------------------|
| M7               | 187.4 $\pm$ 78.2 | 220.4 $\pm$ 73.1 |
| TiO <sub>2</sub> | 181.3 $\pm$ 88.9 | 115.6 $\pm$ 71.4 |
| SiO <sub>2</sub> | 206.2 $\pm$ 76.0 | 162.1 $\pm$ 57.9 |
| C60              | 225.7 $\pm$ 48.0 | 277.6 $\pm$ 65.9 |

**Figure S3** Size distribution of MWCNT-7, TiO<sub>2</sub>, SiO<sub>2</sub>, and C60 in the suspension

1.6 ml of the four ENM suspensions (equal to 800  $\mu$ g of each ENM) were added with 1 ml of saline or the 20-fold concentrated rat BALF, and incubated at 37°C in a shaker at 200 rpm for 4-6 hours. Size distribution in 500  $\mu$ g/ml suspensions of MWCNT-7, TiO<sub>2</sub>, SiO<sub>2</sub> and C60 in the absence (A, C, E and G) or presence (B, D, F and H) of BALF were analyzed with a NanoSight 300 analyzer (Malvern). The representative size distribution curves are shown in figures A and B for MWCNT-7, C and D for TiO<sub>2</sub>, E and F for SiO<sub>2</sub>, and G and H for C60, respectively. The mean size and standard deviation (s.d.) for each kind of the ENMs are displayed in the table (E)

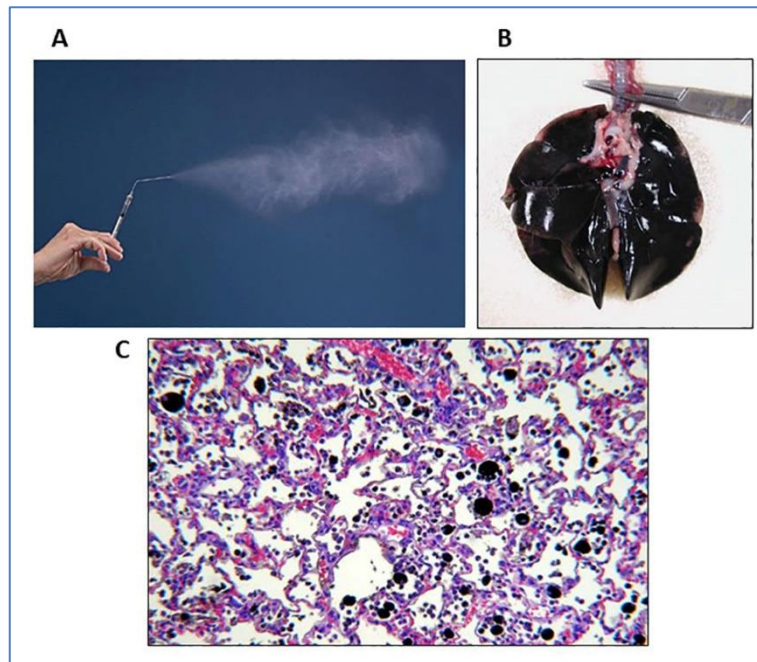

#### **Figure S4 Intratracheal spraying**

1.0 ml of black ink was sprayed into the lung of a 6-week-old SD rat using an intratracheal aerosolizer (series IA-1B, Penn-century, Philadelphia, USA). A. the intratracheal aerosolizer; B. the sprayed ink was evenly distributed in each lobe of the lung; and C. light microscopy showed the sprayed ink in the lung tissue.

**Table S1 LC-MS analysis of the nanomaterial-bound proteins**

The bound proteins in each group were analyzed by LC/MS. The top 120 proteins in the table are listed by values of IBAQ (intensity-based absolute-protein-quantification) indicating abundance of each bound protein.

| No. | MWCNT-7                      | TiO <sub>2</sub>                         | SiO <sub>2</sub>                         | C60                                      |
|-----|------------------------------|------------------------------------------|------------------------------------------|------------------------------------------|
| 1   | Hemoglobin subunit beta-2    | Hemoglobin subunit alpha-1/2             | Glyceraldehyde-3-phosphate               | Hemoglobin subunit beta-2                |
| 2   | Hemoglobin subunit alpha-1/2 | Hemoglobin subunit beta-2                | Hemoglobin subunit beta-1                | Beta-actin                               |
| 3   | Beta-actin                   | Uncharacterized protein                  | Elongation factor 1-alpha                | Hemoglobin subunit alpha-1/2             |
| 4   | Glyceraldehyde-3-phosphate   | Hemoglobin subunit beta-1                | Beta-actin                               | Fibrinogen beta chain                    |
| 5   | Apolipoprotein A-II          | Beta-actin                               | Hemoglobin subunit alpha-1/2             | Anionic trypsin-1                        |
| 6   | Serum albumin                | Elongation factor 1-alpha                | Protein S100-A8                          | Fibrinogen gamma chain                   |
| 7   | Uncharacterized protein      | Glyceraldehyde-3-phosphate dehydrogenase | Apolipoprotein A-I                       | Glyceraldehyde-3-phosphate dehydrogenase |
| 8   | Apolipoprotein C-II          | Uncharacterized protein                  | Eukaryotic translation initiation factor | Fibrinogen alpha chain                   |
| 9   | Uteroglobin                  | Protein S100-A6                          | Uncharacterized protein                  | Uncharacterized protein                  |
| 10  | Elongation factor 1-alpha    | LOC367586 protein                        | T-complex protein 1 subunit beta         | Beta-defensin                            |
| 11  | Apolipoprotein C-I           | Histidine-rich glycoprotein              | Apolipoprotein C-III                     | Elongation factor 1-alpha                |
| 12  | Hemoglobin subunit beta-1    | Protein S100-A9                          | Hemoglobin subunit beta-2                | Apolipoprotein A-II                      |
| 13  | Heat shock 27kDa protein 1   | Lysozyme                                 | Transketolase                            | Myosin light polypeptide 6               |
| 14  | LOC367586 protein            | Apolipoprotein H                         | Apolipoprotein E                         | Hemoglobin subunit beta-1                |
| 15  | Beta-defensin 4              | Apolipoprotein A-II                      | Histidine-rich glycoprotein              | Lysozyme                                 |
| 16  | Protein S100                 | Protein S100-A8                          | Tubulin beta chain                       | Heat shock protein beta-1                |

|    |                                              |                                                          |                                       |                                                  |
|----|----------------------------------------------|----------------------------------------------------------|---------------------------------------|--------------------------------------------------|
| 17 | Lysozyme                                     | Apolipoprotein E                                         | Apolipoprotein A-IV                   | <b>Pulmonary surfactant-associated protein D</b> |
| 18 | BPI fold-containing family A member 1        | Tubulin polymerization-promoting protein family member 3 | Apolipoprotein C-I                    | Myosin regulatory light chain 12B                |
| 19 | Apolipoprotein A-I                           | Ig gamma-2B chain C region                               | Lysozyme                              | Apolipoprotein C-II                              |
| 20 | Apolipoprotein C-III                         | Zero beta-globin                                         | LOC367586 protein                     | Myosin, heavy polypeptide 9                      |
| 21 | Glutathione peroxidase 3                     | Four and a half LIM domains 1                            | Serum albumin                         | Tubulin beta-4B chain                            |
| 22 | Fibrinogen alpha chain                       | Ig kappa chain C region                                  | Lipoprotein lipase                    | Apolipoprotein A-I                               |
| 23 | Tubulin beta chain                           | Annexin A1                                               | Heat shock 27kDa protein 1            | Apolipoprotein C-I                               |
| 24 | Fibrinogen gamma chain                       | Heat shock 27kDa protein 1                               | Adenylyl cyclase-associated protein 1 | Apolipoprotein E                                 |
| 25 | Uncharacterized protein                      | Beta-defensin 4                                          | Beta-defensin 4                       | Uteroglobin                                      |
| 26 | ADP-ribosylation factor 5                    | Igh-6 protein                                            | Apolipoprotein A-II                   | Protein S100-A6                                  |
| 27 | Fibrinogen beta chain                        | Transketolase                                            | Complement C4                         | Globin c2                                        |
| 28 | Ig gamma-2B chain C region                   | GTP-binding nuclear protein Ran                          | Uteroglobin                           | LOC367586 protein                                |
| 29 | Zero beta-globin                             | Fibrinogen gamma chain                                   | Transketolase                         | Fibronectin                                      |
| 30 | Pneumo secretory protein 1                   | Complement component C9                                  | Transthyretin                         | Apolipoprotein A-IV                              |
| 31 | Clusterin                                    | Tubulin beta chain                                       | BPI fold-containing family A member 1 | Serum albumin                                    |
| 32 | ADP-ribosylation factor 3                    | Globin a4                                                | Fibrinogen beta chain                 | BPI fold-containing family A member 1            |
| 33 | Ig lambda-2 chain C region                   | Uncharacterized protein                                  | ADP-ribosylation factor 5             | Ribosomal protein S19-like2                      |
| 34 | Uncharacterized protein                      | Fibrinogen beta chain                                    | Apolipoprotein C-II                   | Dermcidin                                        |
| 35 | Alpha-2-HS-glycoprotein                      | Apolipoprotein C-I                                       | Heat shock cognate 71 kDa protein     | Zero beta-globin                                 |
| 36 | Keratin, type I cytoskeletal                 | Fibrinogen alpha chain                                   | Ig gamma-2B chain C region            | Kng2 protein                                     |
| 37 | Myosin light polypeptide 6                   | Eukaryotic translation initiation factor 5A-1            | Apolipoprotein H                      | ADP-ribosylation factor 5                        |
| 38 | Inter alpha-trypsin inhibitor, heavy chain 4 | Globin c2                                                | Fibrinogen alpha chain                | GTP-binding nuclear protein                      |

## Supplementary Material

|    |                                                        |                                         |                                                                   |                                    |
|----|--------------------------------------------------------|-----------------------------------------|-------------------------------------------------------------------|------------------------------------|
| 39 | Apolipoprotein A-IV                                    | Apolipoprotein A-IV                     | Fibrinogen gamma chain                                            | Ig kappa chain C region            |
| 40 | Serotransferrin                                        | Coagulation factor XII                  | Four and a half LIM domains 1                                     | Barrier-to-autointegration factor  |
| 41 | Apolipoprotein E                                       | Cofilin-1                               | Beta-2 globin                                                     | Lymphocyte antigen 6B              |
| 42 | Kng2 protein                                           | Actin, alpha cardiac muscle 1           | Serine protease inhibitor                                         | Histone cluster 1 H1 family member |
| 43 | Ribosomal protein S19-like2                            | Apolipoprotein A-I                      | Inter alpha-trypsin inhibitor, heavy chain 4                      | Apolipoprotein C-III               |
| 44 | Ras-related C3 botulinum toxin substrate 1             | Peroxiredoxin-2                         | Adiponectin c                                                     | Uncharacterized protein            |
| 45 | Cell division control protein 42 homolog               | Vitronectin                             | ADP-ribosylation factor 3                                         | Clusterin                          |
| 46 | Tubulin beta-5 chain                                   | Myosin light polypeptide 6              | Myosin light polypeptide 6                                        | Uncharacterized protein            |
| 47 | BWK3                                                   | Peroxiredoxin-4                         | Actin, alpha cardiac muscle 1                                     | 40S ribosomal protein S3           |
| 48 | <b>Pulmonary surfactant-associated protein D</b>       | Apolipoprotein C-II                     | 40S ribosomal protein S12                                         | Uncharacterized protein            |
| 49 | 40S ribosomal protein S3                               | Complement C4                           | Uncharacterized protein                                           | RAT Igh-6 protein                  |
| 50 | Transforming protein RhoA                              | Complement inhibitory factor H          | Tubulin polymerization-promoting protein family member 3          | Glutathione peroxidase 3           |
| 51 | 40S ribosomal protein S12                              | Ig lambda-2 chain C region              | Dermcidin                                                         | Transforming protein RhoA          |
| 52 | Uncharacterized protein                                | 40S ribosomal protein S12               | Complement inhibitory factor H                                    | Tissue-type transglutaminase       |
| 53 | Ig kappa chain C region                                | Protein disulfide-isomerase             | Elongation factor 2                                               | RAT Ig gamma-2B chain C region     |
| 54 | Serine/cysteine peptidase inhibitor, clade C, member 1 | 40S ribosomal protein S3                | Peroxiredoxin-2                                                   | BWK3                               |
| 55 | Histone cluster 1 H1 family member d                   | Serine protease inhibitor               | Translationally-controlled tumor protein                          | High mobility group box 1          |
| 56 | 40S ribosomal protein S4                               | Cysteine and glycine-rich protein 1     | Carbamoyl-phosphate synthetase 2, aspartate transcarbamylase, and | Annexin A2                         |
| 57 | Platelet factor 4                                      | Ezrin                                   | Protein S100-A6                                                   | Ras-related protein Rap-1b         |
| 58 | GTP-binding nuclear protein Ran                        | C-type lectin domain family 3, member B | Complement component C9                                           | Septin-9                           |
| 59 | 40S ribosomal protein S14                              | Kng2 protein                            | Ribosomal protein S19-like2                                       | Protein S100-A11                   |
| 60 | Ras-related protein Rap-1b                             | Elongation factor 2                     | GTP-binding nuclear protein Ran                                   | Ig lambda-2 chain C region         |



|    |                                       |                                            |                                                  |                                            |
|----|---------------------------------------|--------------------------------------------|--------------------------------------------------|--------------------------------------------|
| 61 | Myosin, heavy polypeptide 9           | Ig gamma-2C chain C region                 | Histone H4                                       | Pneumo secretory protein 1                 |
| 62 | Actin, alpha cardiac muscle 1         | Heat shock protein HSP 90-alpha            | Tubulin beta-5 chain                             | Similar to 60S acidic ribosomal protein P2 |
| 63 | SAR1 gene homolog A                   | BPI fold-containing family A member 1      | C-type lectin domain family 3, member B          | Tubulin beta-5 chain                       |
| 64 | BPI fold-containing family B member 1 | Ras-related C3 botulinum toxin substrate 1 | Myosin regulatory light chain 12B                | 40S ribosomal protein S14                  |
| 65 | Hemopexin                             | Ribosomal protein S19-like2                | <b>Pulmonary surfactant-associated protein D</b> | 60S ribosomal protein L22                  |
| 66 | Transthyretin                         | Transforming protein RhoA                  | Ras-related C3 botulinum toxin substrate 1       | ATP-binding cassette sub-family B member 9 |
| 67 | Igh-6 protein                         | Translationally-controlled tumor protein   | Pneumo secretory protein 1                       | Platelet factor 4                          |
| 68 | Poly(rC)-binding protein 2            | Heat shock cognate 71 kDa protein          | 40S ribosomal protein S3                         | Protein S100-A8                            |
| 69 | 60S ribosomal protein L11             | Inter alpha-trypsin inhibitor, heavy chain | Ig kappa chain C region                          | Plasminogen                                |
| 70 | Dextrin                               | Heat shock protein HSP 90-beta             | Clusterin                                        | T-complex protein 1 subunit beta           |
| 71 | RAB1A, member RAS oncogene family     | Myosin regulatory light chain 12B          | Moesin                                           | Alpha-2-HS-glycoprotein                    |
| 72 | Uncharacterized protein               | Protein S100-A11                           | Kng2 protein                                     | 40S ribosomal protein S6                   |
| 73 | Cofilin-1                             | Adenylyl cyclase-associated protein 1      | Igh-6 protein                                    | Secretoglobin, family 3A, member 1         |
| 74 | Uncharacterized protein               | Glutathione peroxidase 3                   | Ras-related protein Rap-1b                       | RAB1A, member RAS oncogene family          |
| 75 | RAB5C, member RAS oncogene family     | Serum albumin                              | Uncharacterized protein                          | Annexin A1                                 |
| 76 | Glutathione peroxidase 1              | Uncharacterized protein                    | Transforming protein RhoA                        | Calcium-binding protein 4                  |
| 77 | 40S ribosomal protein S5              | 40S ribosomal protein S18                  | Desmoplakin                                      | Peroxiredoxin-1                            |
| 78 | Dermcidin                             | Apolipoprotein C-III                       | Uncharacterized protein                          | Cell division control protein 42 homolog   |
| 79 | Heat shock cognate 71 kDa protein     | Cysteine-rich protein 1                    | Glutathione peroxidase 3                         | 40S ribosomal protein S3a                  |
| 80 | 40S ribosomal protein S7              | Complement factor B                        | Anti-F4/80 kappa light chain variable            | Myosin light chain 1/3                     |
| 81 | 40S ribosomal protein S3a             | Fibronectin                                | Globin c2                                        | 40S ribosomal protein S12                  |
| 82 | Uncharacterized protein               | Eukaryotic translation initiation factor 1 | Uncharacterized protein                          | Histidine-rich glycoprotein                |

## Supplementary Material

|     |                                        |                                               |                                                       |                                                  |
|-----|----------------------------------------|-----------------------------------------------|-------------------------------------------------------|--------------------------------------------------|
| 83  | Annexin A1                             | Annexin A2                                    | Proliferation-associated protein 2G4                  | SAR1 gene homolog A                              |
| 84  | Galectin-1                             | Uncharacterized protein                       | Uncharacterized protein                               | Actin, alpha cardiac muscle 1                    |
| 85  | 60S ribosomal protein L22              | Uncharacterized protein                       | Fibronectin                                           | Uncharacterized protein                          |
| 86  | Heat shock protein HSP 90-alpha        | Moesin                                        | Cysteine and glycine-rich protein 1                   | Cytochrome b5                                    |
| 87  | Heat shock protein HSP 90-beta         | BWK3                                          | Annexin A1                                            | Ras-related C3 botulinum toxin substrate 1       |
| 88  | Protein S100-A11                       | Uncharacterized protein                       | Alpha-2-HS-glycoprotein                               | 40S ribosomal protein S17-like                   |
| 89  | Prothrombin                            | ADP-ribosylation factor 5                     | Histone cluster 1 H1 family member d                  | Myosin heavy chain 14                            |
| 90  | Heterogeneous ribonucleoproteins A2/B1 | nuclear Uncharacterized protein               | Heat shock protein HSP 90-alpha                       | 40S ribosomal protein S18                        |
| 91  | Myosin regulatory light chain 12B      | Dynein light chain 1                          | GTP-binding protein SAR1b                             | ADP-ribosylation factor 3                        |
| 92  | Kininogen-1                            | Inter-alpha-trypsin inhibitor heavy chain 2   | Uncharacterized protein                               | Ras-related protein Rab-6A                       |
| 93  | Uncharacterized protein                | Uteroglobin                                   | Heat shock protein HSP 90-beta                        | ADP-ribosylation factor 4                        |
| 94  | Secretoglobin, family 3A, member 1     | Adiponectin                                   | <b>Pulmonary surfactant-associated protein B</b>      | Globin a4                                        |
| 95  | Uncharacterized protein                | Uncharacterized protein                       | TNF alpha-induced protein 8                           | 40S ribosomal protein S5                         |
| 96  | Immunoglobulin joining chain           | Complement C3                                 | Myosin, heavy polypeptide 9                           | 60S ribosomal protein L11                        |
| 97  | ADP-ribosylation factor 4              | Myristoylated alanine-rich C-kinase substrate | 40S ribosomal protein S4                              | 40S ribosomal protein S4                         |
| 98  | 40S ribosomal protein S6               | EH domain-containing protein 1                | Cofilin-1                                             | Glutathione peroxidase 1                         |
| 99  | Uncharacterized protein                | 40S ribosomal protein S14                     | Uncharacterized protein                               | <b>Pulmonary surfactant-associated protein B</b> |
| 100 | 40S ribosomal protein S25              | Selenoprotein P                               | BPI fold-containing family B member 1                 | Vitronectin                                      |
| 101 | Vimentin                               | Actin-related protein 2                       | Serine/cysteine peptidase inhibitor, clade C member 1 | Placenta-specific 8                              |
| 102 | T-kininogen 1                          | 40S ribosomal protein S3a                     | Uncharacterized protein                               | Complement C1q subcomponent subunit B            |

|     |                                                  |                                                       |                                                                        |                                                                       |
|-----|--------------------------------------------------|-------------------------------------------------------|------------------------------------------------------------------------|-----------------------------------------------------------------------|
| 103 | Elongation factor 1-delta                        | Serine/cysteine peptidase inhibitor, clade C member 1 | Eukaryotic peptide chain release factor GTP-binding subunit ERF3B-like | BPI fold-containing family B member 1                                 |
| 104 | Septin-9                                         | Retinal dehydrogenase 1                               | Ig lambda-2 chain C region                                             | Uncharacterized protein                                               |
| 105 | T-complex protein 1 subunit beta                 | Myosin, heavy polypeptide 9                           | Activator of Hsp90 ATPase activity 1                                   | Serine/cysteine peptidase inhibitor, clade C (Antithrombin), member 1 |
| 106 | Complement C3                                    | Inter-alpha trypsin inhibitor, heavy chain 1          | 40S ribosomal protein S25                                              | Heat shock protein HSP 90-alpha                                       |
| 107 | RCG31562, isoform CRA_c                          | Ube2l3 protein                                        | 40S ribosomal protein S5                                               | Poly(rC)-binding protein 2                                            |
| 108 | Uncharacterized protein                          | Actin-related protein 2/3 complex subunit 4           | Serotransferrin                                                        | 40S ribosomal protein S25                                             |
| 109 | Myristoylated alanine-rich C-kinase substrate    | C4b-binding protein alpha chain                       | Calcium-binding protein 4                                              | <b>Pulmonary surfactant-associated protein A</b>                      |
| 110 | Similar to 60S acidic ribosomal protein P2       | Adiponectin c                                         | Complement C3                                                          | RAB5C                                                                 |
| 111 | Rps16 protein                                    | Actin-related protein 3                               | Vitronectin                                                            | Immunoglobulin joining chain                                          |
| 112 | <b>Pulmonary surfactant-associated protein B</b> | <b>Pulmonary surfactant-associated protein D</b>      | Uncharacterized protein                                                | Heat shock cognate 71 kDa protein                                     |
| 113 | Vitronectin                                      | Plasminogen                                           | 60S ribosomal protein L22                                              | Complement C3                                                         |
| 114 | Adenine phosphoribosyltransferase                | 40S ribosomal protein S25                             | Protein disulfide-isomerase                                            | Uncharacterized protein                                               |
| 115 | Uncharacterized protein                          | Small ubiquitin-related modifier 2                    | RAB1A                                                                  | 40S ribosomal protein S7                                              |
| 116 | Fibronectin                                      | Coronin-1A                                            | Rps16 protein                                                          | Complement component C9                                               |
| 117 | Dynein light chain 1                             | Prothrombin                                           | 40S ribosomal protein S6                                               | Microsomal glutathione S-transferase                                  |
| 118 | Calpain small subunit 1                          | Uncharacterized protein                               | 40S ribosomal protein S14                                              | Histone H4                                                            |
| 119 | Murinoglobulin-1                                 | Immunoglobulin joining chain                          | Histone H2B                                                            | Rps16 protein                                                         |
| 120 | Barrier-to-autointegration factor                | 60S ribosomal protein L5                              | Plasminogen activator inhibitor 1 RNA-binding protein                  | Protein S100-A4                                                       |

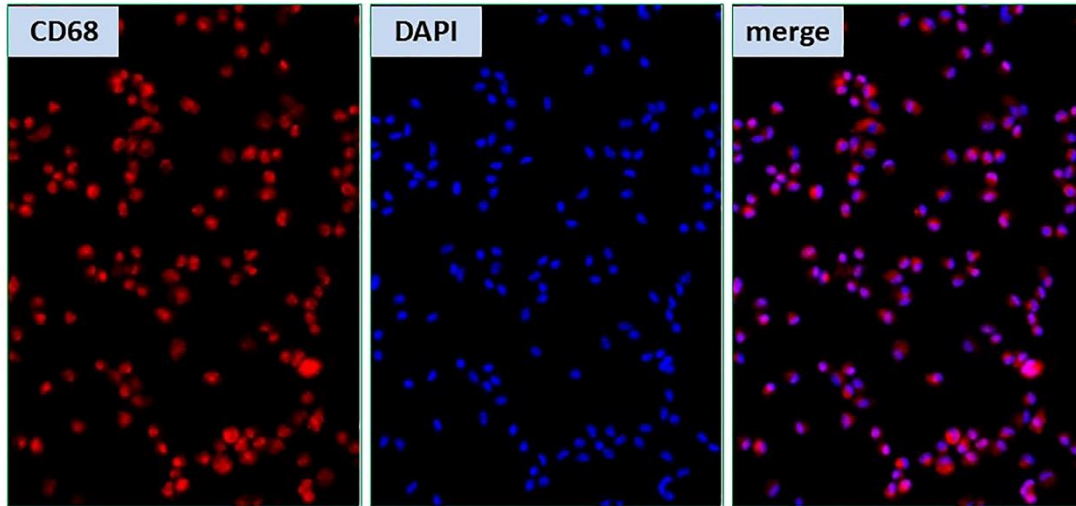

### **Figure S5 Immunostaining of primary alveolar macrophages**

Isolated primary alveolar macrophages were immunostained with CD68, a macrophage marker, to confirm their identity. The nucleus was stained with DAPI. The images were observed and captured using a fluorescence microscope (ZEISS LSM880+Airyscan, Germany)

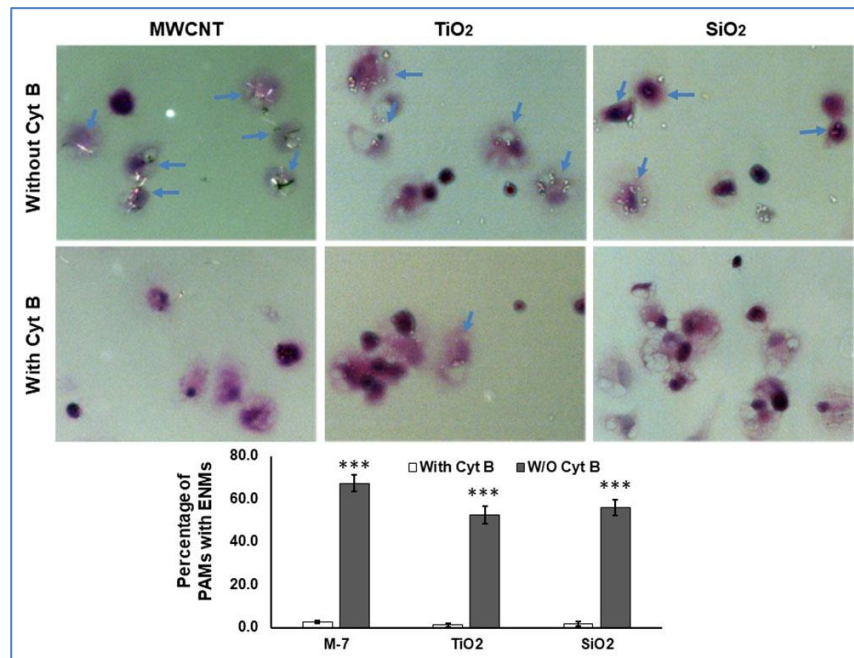

**Figure S6 Uptake of ENMs by PAMs via phagocytosis**

$5 \times 10^5$  primary alveolar macrophages (PAMs) in a 6-well plate were treated with or without  $5 \mu\text{g/ml}$  cytochalasin B (Cyt B, an inhibitor of actin polymerization, Solarbio, Beijing, China) for 1h and then exposed with MWCNT-7,  $\text{TiO}_2$ , or  $\text{SiO}_2$  pre-incubated with BALF for another 12h. The cells were fixed, eosin-stained and observed under an ECLIPSE polarizing microscope (LV100NPOL, Nikon, Japan). Percentages of the PAMs with burden particles (arrows) were calculated.

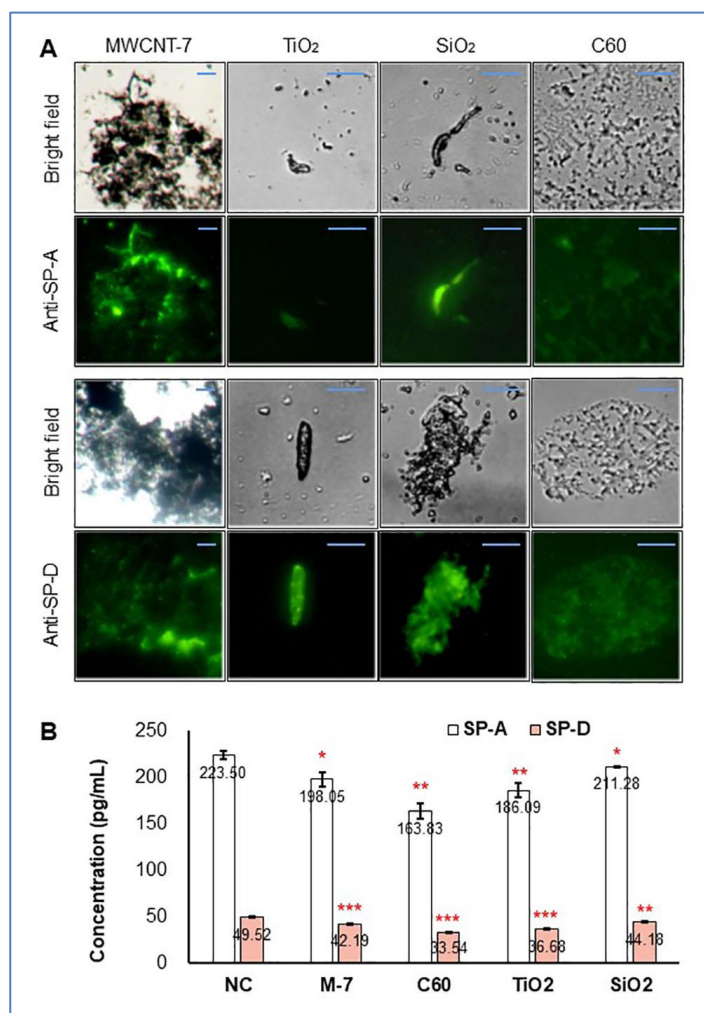

**Figure S7 Binding of SP-A and SP-D to the ENMs**

400  $\mu$ l of each of 4 ENM suspensions (equal to 200  $\mu$ g of each ENM) was incubated with 250  $\mu$ l of the 10-fold concentrated BALF at 37°C in a shaker at 200 rpm for 6 hours, centrifuged at 4°C, 20000  $\times$  g, for 10 min. A. the precipitated ENMs were used for immunofluorescence staining and the supernatants were used for ELISA detection of SP-A and SP-D. Briefly, the precipitates were washed 3 times and incubated with rabbit anti-rat SP-A or SP-D antibodies (1:100 dilution, Affinity, Wuhan, China) at 4°C overnight. After washing, the ENMs were visualized with Cy3 labelled goat anti-rabbit IgG (1:100 dilution, Proteintech, Wuhan, China). Images were captured with a fluorescence microscope (ZEISS LSM880+Airyscan, Germany). B. SP-A and SP-D in the supernatants were detected using rat ELISA kits (MLBio, Shanghai, China) according to the manufacturer's instructions. Two-tailed students' t-test was used for statistical comparison, and \*, \*\* and \*\*\* represent p values less than 0.05, 0.01 and 0.001, respectively.

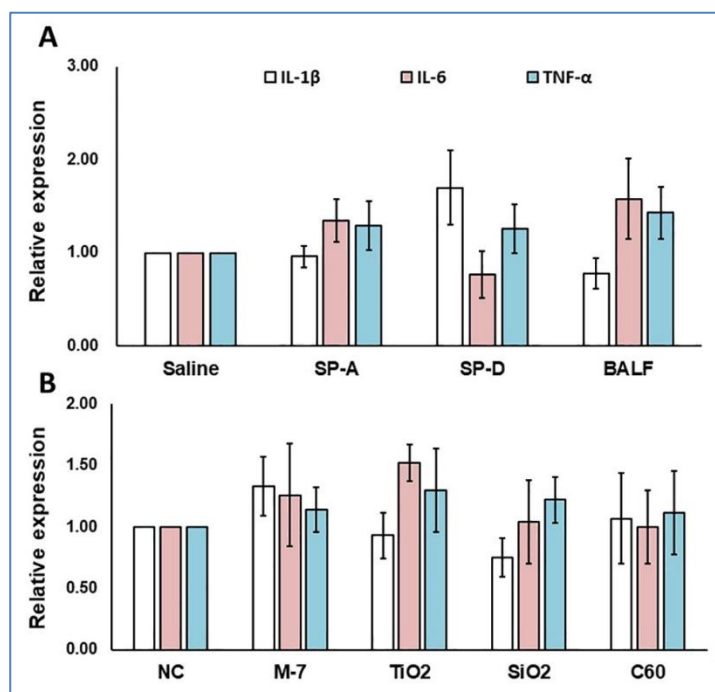

**Figure S8 Effects of SP-A, SD-D, BALF and ENMs on expression of cytokines**

$1 \times 10^6$  primary alveolar macrophages (PAMs) in a 6-well plate were treated with saline,  $1 \mu\text{g/ml}$  SP-A/SP-D, or  $20 \mu\text{l}$  of 10-fold concentrated BALF for 12h (A);  $1 \times 10^6$  PAMs were treated with saline containing 0.5% PF-68 (NC),  $1 \mu\text{g/ml}$  of MWCNT-7,  $\text{TiO}_2$ ,  $\text{SiO}_2$ , or C60 suspensions for 12h (B). Total RNAs were isolated for qRT-PCR analysis of IL-1 $\beta$ , TNF- $\alpha$  and IL-6, using GAPDH as an internal reference. Two-tailed students' t-test was used for statistical comparison.

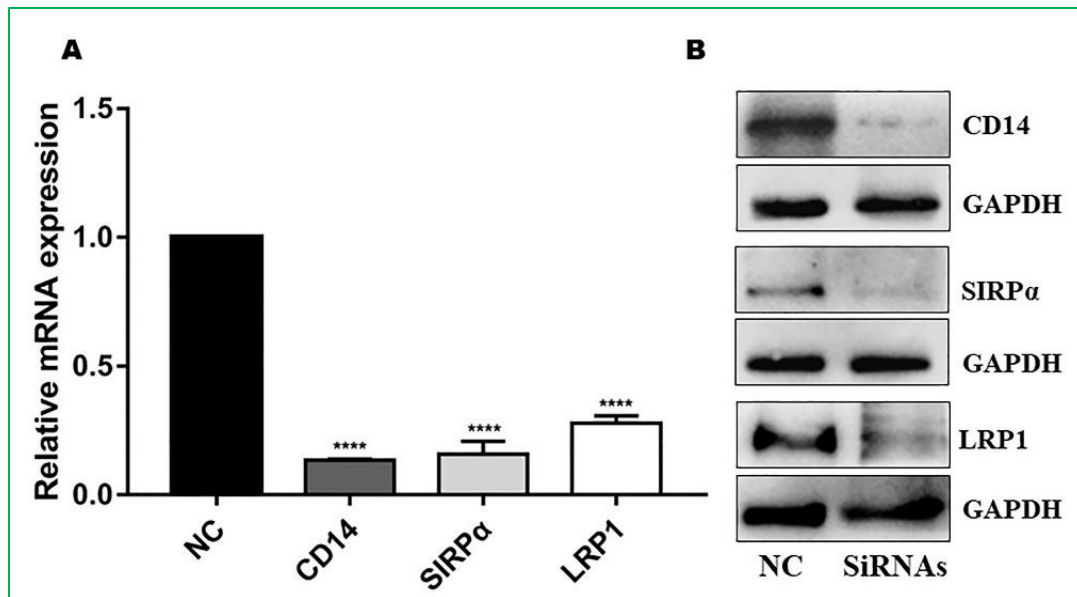

**Figure S9 Knockdown of CD14, LRP1, and SIRP $\alpha$  expression in PAMs**

CD14, LRP1, and SIRP $\alpha$  expression in primary alveolar macrophages was knocked down by gene-specific siRNAs. The silencing efficacy for LRP1, CD14, and SIRP $\alpha$  was analyzed by qPCR (A) and confirmed by western blotting (B).



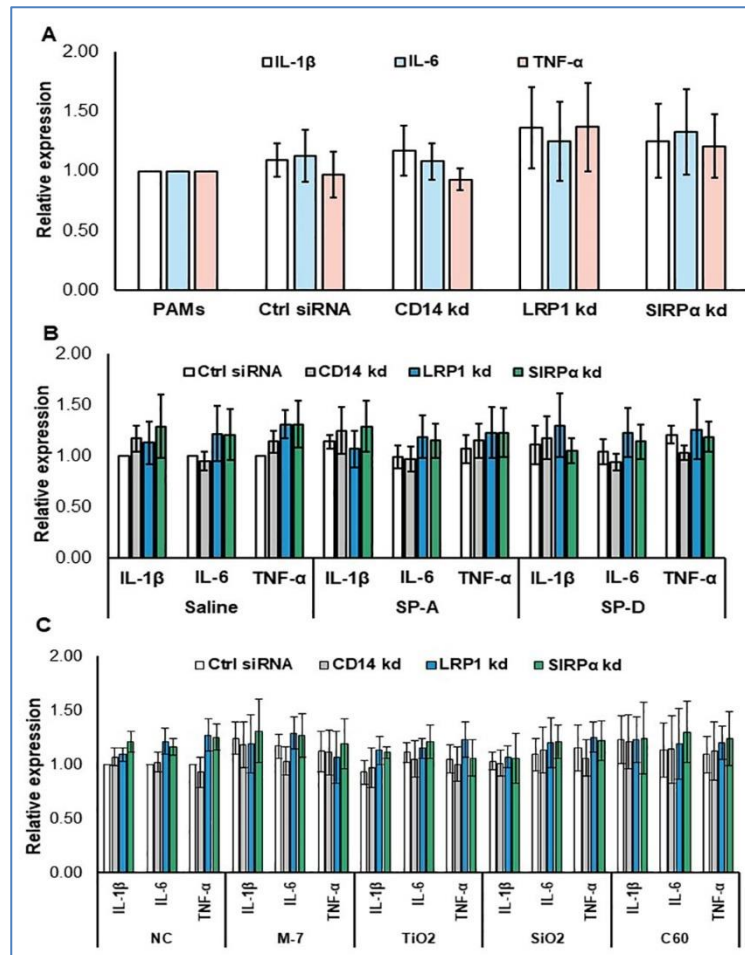

**Figure S10 Effects of SP-A, SD-D, BALF and ENMs on expression of cytokines in the receptors-knocked down PAMs**

$1 \times 10^6$  rat PAMs in a 6-well plate was transfected with negative control RNA, or gene-specific siRNAs for LRP1, CD14, and SIRP $\alpha$  and cultured at 37°C for 6h (A); and after the culture media was changed to X-VIVO<sup>TM</sup> serum-free medium (Lonza), the cells were treated with saline, 1 $\mu$ g/ml of SP-A or SP-D and cultured for 12h (B), or treated with saline containing 0.5% (NC), 1 $\mu$ g/ml of MWCNT-7, TiO<sub>2</sub>, SiO<sub>2</sub>, or C60 suspended in saline containing 0.5% for 12h. Total RNAs were isolated for qRT-PCR analysis of IL-1 $\beta$ , TNF- $\alpha$  and IL-6, using GAPDH as an internal reference. Two-tailed students' t-test was used for statistical comparison.

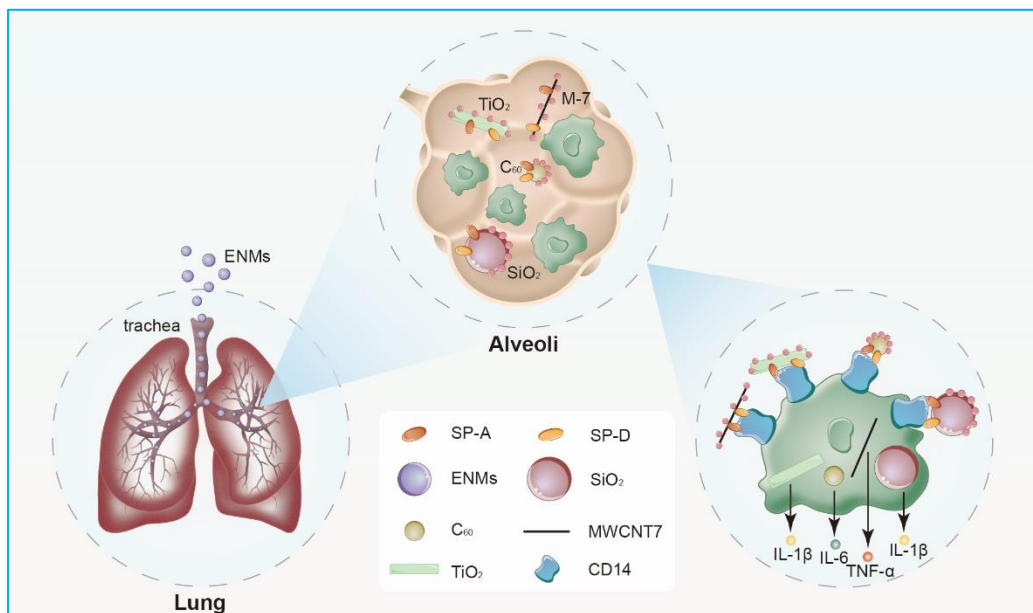

Figure 11 Summarized results
